# Supplementary material
Source: PubMed Central journal article supplement (PMC4100990)
Supplement: cbt-15-895-s01.pdf [file cbt-15-895-s01.pdf]

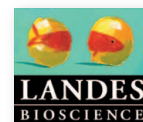

## **Supplemental Material to:**

**Jennifer C Shing, Jae Won Choi, Robert Chapman,  
Mark A Schroeder, Jann N Sarkaria, Abdul Fauq,  
and Richard J Bram**

**A novel synthetic 1,3-phenyl bis-urea compound targets  
microtubule polymerization to cause cancer cell death**

**Cancer Biology & Therapy 2014; 15(7)  
<http://dx.doi.org/10.4161/cbt.28881>**

**<http://www.landesbioscience.com/journals/cbt/article/28881/>**

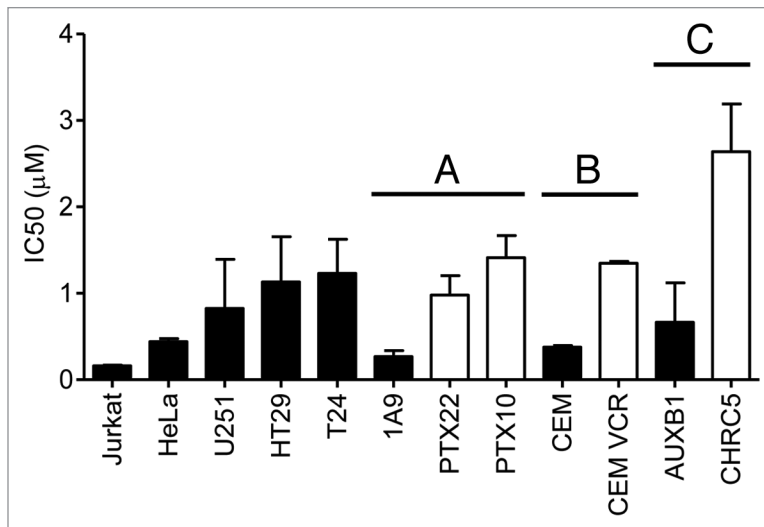

**Figure S1.** Half-maximal concentrations for cancer and drug-resistant cell lines treated with 41J. Cells were treated with 41J for 48 h and viability was determined by the resazurin assay. Non-linear least-squares regression was performed to determine the half-maximal concentration ( $IC_{50}$ ) for each drug. (A–C) Parental cell lines (black) are indicated with cell lines resistant to paclitaxel (A), vincristine (B), or colchicine (C) (white).

**Table S1.** Gene expression changes due to 41J treatment

| Symbol                   | Accession ID   | Gene title                                                                                         | Fold change <sup>a</sup> | P value <sup>b</sup> |
|--------------------------|----------------|----------------------------------------------------------------------------------------------------|--------------------------|----------------------|
| <i>Upregulated genes</i> |                |                                                                                                    |                          |                      |
| MAGT1                    | NM_032121.3    | Magnesium transporter 1                                                                            | 2.02                     | 0.0003               |
| TROAP                    | NM_005480.2    | Trophinin associated protein (tastin)                                                              | 1.91                     | 0.001                |
| CCNB1                    | NM_031966.2    | Cyclin B1                                                                                          | 1.88                     | 0.002                |
| BORA                     | NM_024808.2    | Bora, aurora kinase A activator                                                                    | 1.86                     | 0.003                |
| CKS2                     | NM_001827.1    | CDC28 protein kinase regulatory subunit 2                                                          | 1.81                     | 0.003                |
| CENPA                    | NM_001809.2    | Centromere protein A, 17kDa                                                                        | 1.74                     | 0.002                |
| LOC643995                | XM_934412.1    | Predicted: similar to Importin alpha-2 subunit (Karyopherin alpha-2 subunit), transcript variant 4 | 1.74                     | 2.7E-06              |
| NEK2                     | NM_002497.2    | NIMA (never in mitosis gene a)-related kinase 2                                                    | 1.74                     | 0.003                |
| KIF14                    | NM_014875.1    | Kinesin family member 14                                                                           | 1.72                     | 0.004                |
| AURKA                    | NM_198434.1    | Aurora kinase A, transcript variant 3                                                              | 1.72                     | 0.0002               |
| EPHA2                    | NM_004431.2    | EPH receptor A2                                                                                    | 1.70                     | 0.009                |
| CKAP2                    | NM_018204.2    | Cytoskeleton associated protein 2                                                                  | 1.69                     | 0.003                |
| LOC649841                | XM_938906.1    | Predicted: similar to protein immuno-reactive with anti-PTH polyclonal antibodies                  | 1.69                     | 0.011                |
| MCART1                   | NM_033412.1    | Mitochondrial carrier triple repeat 1                                                              | 1.68                     | 0.009                |
| TTK                      | NM_003318.3    | TTK protein kinase                                                                                 | 1.65                     | 0.017                |
| LOC100133840             | XM_001714384.1 | Predicted: similar to hCG1994151                                                                   | 1.65                     | 0.017                |
| KBTBD2                   | NM_015483.1    | Kelch repeat and BTB (POZ) domain containing 2                                                     | 1.63                     | 0.001                |
| LOC441087                | NM_001013716.1 | Hypothetical gene supported by AK125735                                                            | 1.63                     | 0.022                |
| EGR1                     | NM_001964.2    | Early growth response 1                                                                            | 1.63                     | 0.018                |
| HMMR                     | NM_012485.1    | Hyaluronan-mediated motility receptor, transcript variant 2                                        | 1.62                     | 0.002                |

<sup>a</sup>Fold change indicates expression levels for 41J treatment compared to DMSO; <sup>b</sup>P values are based on two-sample t test.

**Table S1.** Gene expression changes due to 41J treatment (continued)

| Symbol                     | Accession ID   | Gene title                                                                          | Fold change <sup>a</sup> | P value <sup>b</sup> |
|----------------------------|----------------|-------------------------------------------------------------------------------------|--------------------------|----------------------|
| <i>Downregulated genes</i> |                |                                                                                     |                          |                      |
| SOX18                      | NM_018419.2    | SRY (sex determining region Y)-box 18                                               | -1.78                    | 0.003                |
| FOXS1                      | NM_004118.3    | Forkhead box S1                                                                     | -1.77                    | 0.009                |
| MGC61598                   | XM_939432.1    | Predicted: similar to ankyrin-repeat protein Nrarp                                  | -1.66                    | 0.001                |
| TUBB3                      | NM_006086.2    | Tubulin, beta 3                                                                     | -1.58                    | 0.002                |
| LOC100132439               | XM_001719283.1 | Predicted: similar to Protein FAM27E3                                               | -1.55                    | 0.023                |
| TUBA4A                     | NM_006000.1    | Tubulin, alpha 4a                                                                   | -1.52                    | 0.021                |
| PLEKHF1                    | NM_024310.2    | Pleckstrin homology domain containing, family F (with FYVE domain) member 1         | -1.50                    | 0.006                |
| MFSD5                      | NM_032889.2    | Major facilitator superfamily domain containing 5                                   | -1.49                    | 0.005                |
| HES2                       | NM_019089.3    | Hairy and enhancer of split 2 (Drosophila)                                          | -1.48                    | 0.002                |
| TUBB2A                     | NM_001069.2    | Tubulin, beta 2A                                                                    | -1.48                    | 0.012                |
| LOC255783                  | XR_001409.1    | Predicted: hypothetical protein LOC255783, transcript variant 2, misc RNA           | -1.45                    | 0.016                |
| EFNA1                      | NM_004428.2    | Ephrin-A1, transcript variant 1                                                     | -1.45                    | 0.012                |
| FOXC1                      | NM_001453.1    | Forkhead box C1                                                                     | -1.45                    | 0.014                |
| LOC100134073               | XM_001718050.1 | Predicted: similar to LYPDC1 protein (LOC100134073)                                 | -1.42                    | 0.005                |
| TUBB2B                     | NM_178012.3    | Tubulin, beta 2B                                                                    | -1.42                    | 0.001                |
| LOC92755                   | XR_016140.2    | Predicted: miscRNA                                                                  | -1.41                    | 0.002                |
| SOX9                       | NM_000346.2    | SRY (sex determining region Y)-box 9 (campomelic dysplasia, autosomal sex-reversal) | -1.41                    | 0.009                |
| SNORA24                    | NR_002963.1    | Small nucleolar RNA, H/ACA box 24                                                   | -1.41                    | 0.030                |
| RGMA                       | NM_020211.1    | RGM domain family, member A                                                         | -1.40                    | 0.015                |
| SOX13                      | NM_005686.2    | SRY (sex determining region Y)-box 13                                               | -1.40                    | 0.013                |

<sup>a</sup>Fold change indicates expression levels for 41J treatment compared to DMSO; <sup>b</sup>P values are based on two-sample *t* test.
